# Supplementary material for: Multi-metal electrohydrodynamic redox 3D printing at the submicron scale
Source: PubMed Central journal article supplement (PMC6479051; doi:10.1038/s41467-019-09827-1), 2019-04-23
Supplement: 41467_2019_9827_MOESM3_ESM.pdf [file 41467_2019_9827_MOESM3_ESM.pdf]

## Description of Additional Supplementary Files

File Name: Supplementary Movie 1

Description: On-the-fly switching between Cu and Ag. Optical video of the printing process of a Cu wall with the letters 'Ag' imprinted in silver (as shown in Fig. 2d of the main text). On-the-fly alteration of two metals ejected from the same nozzle enables printing of chemically heterogeneous structures in a continuous layer-by-layer mode. The fast switching between the two materials facilitates a spatio-chemical feature size of <math><400\text{ nm}</math> obtained with minimal pulse width of 100 ms and a printing speed of

File Name: Supplementary Movie 2

Description: Printing a diffraction grating. Optical video of the printing of

File Name: Supplementary Movie 3

Description: Locally tuned strength through gradient porosity. Additive control of the chemical architecture enables tuning of local properties through the local chemistry. The video demonstrates the fabrication of pillars with a porosity gradient modulating the local strength: first, segmented Ag / Cu-Ag pillars are printed. The Cu-Ag alloy contains 45 – 50 at.% Cu. Subsequently, the Cu is chemically dealloyed from the Cu-Ag segments, resulting in Ag pillars that are half dense, half nanoporous. Since the porous segments are softer than the dense segments, lateral deformation of the pillars results in a strong confinement of the plasticity within the porous portions of the pillars. The bending of the pillars is demonstrated in an in situ SEM video. Video playback speeds: printing: 1x, bending: 20x and 11.45x; tilt: printing:
